# Supplementary material for: Photochemical aging of aviation emissions: transformation of chemical and physical properties of exhaust emissions from a laboratory-scale jet engine combustion chamber
Source: Copernicus journal article supplement (doi:10.5194/egusphere-2024-3836), 2025-01-07
Supplement: Supplementary file 1 [file egusphere-2024-3836-supplement.pdf]

## **Supplementary section 1. Offline chemical analyses**

### **Supplementary section 1.1. GC×GC MS analyses**

The GC×GC measurements were carried out on a Pegasus® GC-HRT 4D (LECO, St. Joseph, USA) in combination with an OPTIC-4 GC inlet system (GL Sciences, Netherlands) using Helium as a carrier gas. For the measurements, a circular filter punch (diameter 3 mm) equal to 700 L of sampling volume was introduced into the OPTIC-4. For the fuel measurement, 1 uL of diluted jet fuel (DCM, 1:100 v/v) was applied to a desorbed filter punch. After 2 min of inlet purging (flow 0.1 mL min<sup>-1</sup>, split flow 100 mL min<sup>-1</sup>), a thermal desorption temperature gradient of 2 K s<sup>-1</sup> was applied from 50 °C to 350 °C (flow 2 mL min<sup>-1</sup>, splitless). After thermal desorption, the flow and split flow were set to 1 mL min<sup>-1</sup> and 20 mL min<sup>-1</sup>, respectively.

For the separation, a 60 m BPX5 (0.25 mm internal diameter, 0.25 µm film thickness) column in the 1<sup>st</sup> dimension and 1.5 m BPX50 (0.1 mm internal diameter, 0.1 µm film thickness) in the 2<sup>nd</sup> dimension was used. The initial primary GC oven temperature of 50 °C was held for 10 min and then ramped at 2 K min<sup>-1</sup> to 345 °C which was held for 20 min. The secondary oven temperature offset was +5 °C to the primary oven and the modulator temperature offset was +15 °C to the secondary oven temperature. The modulation time was 3 s.

Ionization of the eluted compounds was performed by electron ionization with 70 eV at 250 °C. The obtained ions were acquired between *m/z* 40 to 500 in “high-resolution-mode” with an acquisition rate of 120 Hz. Perfluorotributylamine (PFTBA) was continuously added to the MS source as internal standard for mass calibration. Calibration and processing of acquired mass spectra was performed with the ChromaTOF HRT software (v5.10, LECO, St. Joe, USA).

### **Supplementary section 1.2. Gas phase analyses.**

Adsorber tubes with three sublayers of GCB (Graphitized Carbon Black) sorbents were used for trapping gas-phase organics of different volatilities (Table S1). Adsorber tubes were conditioned under a protective nitrogen atmosphere at 350 °C for 1 h 30 min for conditioning. QFFs were installed in front of the adsorber tubes to remove particle fractions. Gillian GilAir Plus sampling pumps (Gilian, USA) were used for sampling for 240 min at a flow rate of 0.5 l min<sup>-1</sup> accounting for a total volume of 120 l.

The offline analysis of gas phase samples was performed on the GCMS-QP2010 Ultra, (Shimadzu, Japan) equipped with the thermal desorber unit (TD-20, Shimadzu). Thermal desorption occurred at 340 °C for 45 min. Extracted compounds were first concentrated at 5 °C on a Tenax TD trap, then re-desorbed at 300 °C for 30 min, after which they were transferred to the GC column at a split ratio of 50.

The separation took place on a VF-xMS, high-arylene-modified phase column (30 m + 5 m pre-column, 0.25 mm ø x 0.25 µm t, Agilent Varian, USA) at a column flow of 1.62 mL min<sup>-1</sup>. GC oven temperature was 60 °C for a hold time of 6 min and then increased to a final temperature of 300°C at a rate of 5 °C min<sup>-1</sup>. The MS was operated with ion source temperature of 230 °C and interface temperature of 250 °C in scan mode in the *m/z* range of 30 to 500. An isotope-labeled standard mixture was applied on the adsorber tubes prior to analysis and equivalent target compounds and similar target groups were quantified according to respective standard compounds as documented in Table S3. GCMSsolution Ver.2 software was used for peak identification and quantification.

35

## Supplementary section 2. Conditions in the oxidation flow reactor

The external OH reactivity ( $\text{OHR}_{\text{ext}}$ ) of the sampled exhaust was estimated based on the concentrations of CO, NO,  $\text{NO}_2$ , and  $\text{THC}_{\text{FID}}$  (as ppm propane) assuming reaction rates of  $2.41 \times 10^{-13}$ ,  $1 \times 10^{-11}$ ,  $1.06 \times 10^{-11}$ , and  $1 \times 10^{-12} \text{ cm}^3 \text{ molecules}^{-1} \text{ s}^{-1}$ , respectively.  $\text{OHR}_{\text{ext}}$  in the undiluted sample was approximately  $14\,000 \text{ s}^{-1}$ , with 35 %, 45 %, and 20 % of the total caused by CO, THC, and  $\text{NO}_x$ , respectively. The  $\text{OHR}_{\text{ext}}$  was moderated by sample dilution, leading to  $\text{OHR}_{\text{ext}}$ s of  $280 \text{ s}^{-1}$  or  $70 \text{ s}^{-1}$  for the DR 50 and DR 200 experiments, respectively.

The particulate condensation sinks ( $\text{CS}_{\text{PM}}$ , Table S3) in the PEAR were estimated based on the size distributions measured by SMPS for fresh and aged exhaust downstream the PEAR (Hartikainen et al., 2020). LVOC fates were estimated as in Hartikainen et al., (2020) with the method based on Palm et al., (2016). Lifetime due to condensation to particles was estimated as  $1/\text{CS}$ . LVOC partitioning onto particles was by far the major LVOC fate compared to reactions with OH (Supp. Table S2) or loss to walls (constant LVOC lifetime of 603 s). The photolysis rate in the PEAR for the varying lamp settings was estimated based on the known lamp power, lamp efficiency (30 %) and internal surface area ( $0.47 \text{ m}^2$ ) (Ihalainen et al., 2019), and the as ratio in exposure to photolysis exposure to OH exposure was calculated based on the known lamp settings and the OH exposure determined by butanol-d9 measurements.

## 50 Supplementary figures

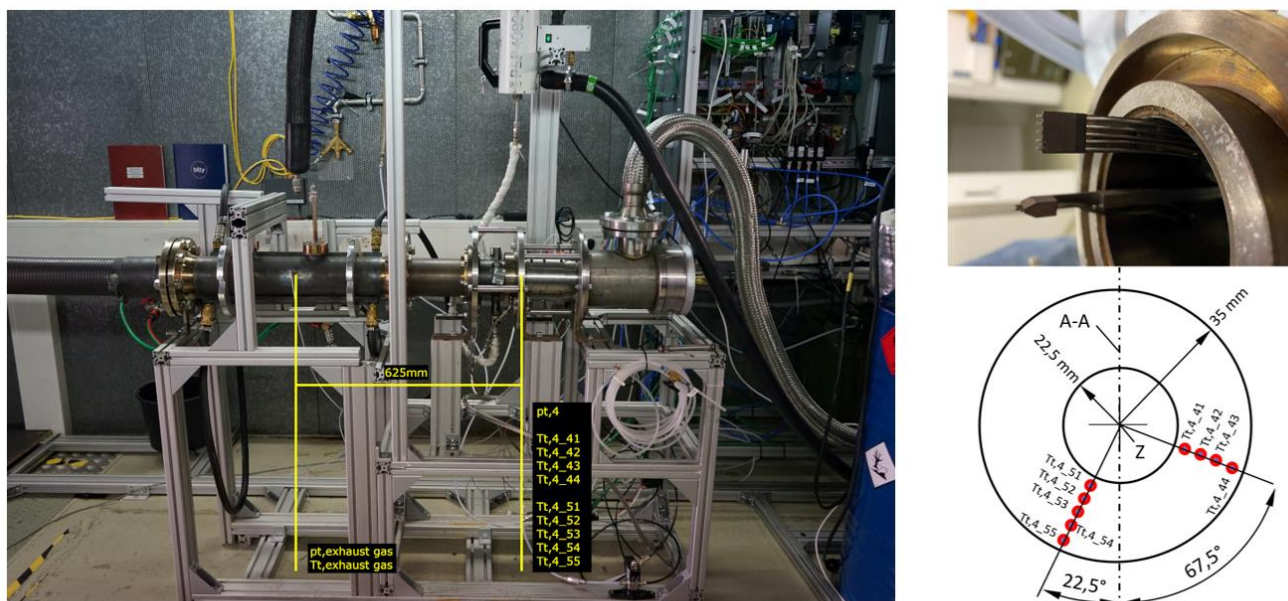

| Mass flow |                         | Temperature            |             |             |         |         |         |         |         |         |         |         | Pressure |             |             |       |
|-----------|-------------------------|------------------------|-------------|-------------|---------|---------|---------|---------|---------|---------|---------|---------|----------|-------------|-------------|-------|
|           | $\dot{m}_{\text{Fuel}}$ | $\dot{m}_{\text{Air}}$ | Total inlet | Exhaust gas | Tt,4_41 | Tt,4_42 | Tt,4_43 | Tt,4_44 | Tt,4_51 | Tt,4_52 | Tt,4_53 | Tt,4_54 | Tt,4_55  | Total inlet | Exhaust gas | pt,4  |
| Unit      | [g s <sup>-1</sup> ]    | [g s <sup>-1</sup> ]   | [°C]        | [°C]        | [°C]    | [°C]    | [°C]    | [°C]    | [°C]    | [°C]    | [°C]    | [°C]    | [°C]     | [bar]       | [bar]       | [bar] |
| Mean      | 1.3                     | 111                    | 24.1        | 380         | 557     | 526     | 474     | 405     | 366     | 368     | 374     | 306     | 199      | 1.32        | 1.08        | 1.28  |
| Std       | 0.01                    | 0.53                   | 0.4         | 5.1         | 9.6     | 15.4    | 44.1    | 58.2    | 15.1    | 11.3    | 10.9    | 17.2    | 26.7     | 0.02        | 0.01        | 0.01  |

**Figure S1.** The setup of the small-scale jet engine and its operation conditions presented as means and standard deviations of the means of eight operation days.

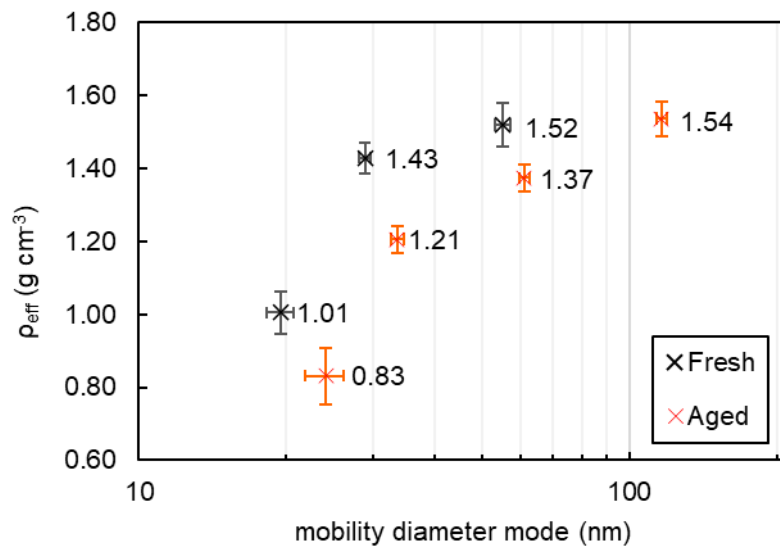

60 **Figure S2. Particle effective densities measured by the AAC-SMPS as a function of mobility diameter mode. The vertical error bars illustrate temporal variation in the densities as standard deviation during the measurements. The horizontal error bars indicate the standard deviation in the mobility diameter mode for each aerodynamic mode setpoint of the AAC (20, 40, 80, and 160 nm).**

Fresh exhaust

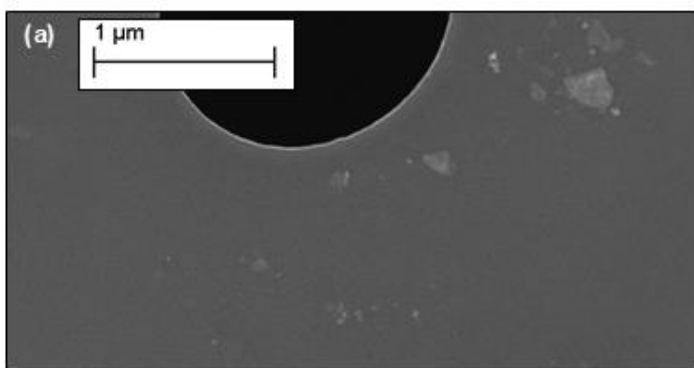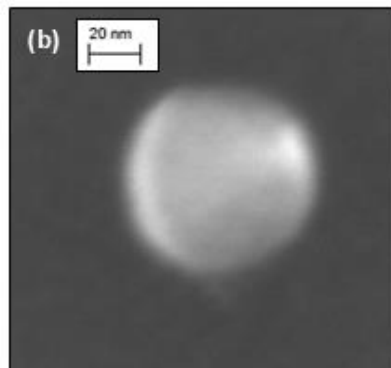

Aged exhaust (DR 50, 2 eqv.d)

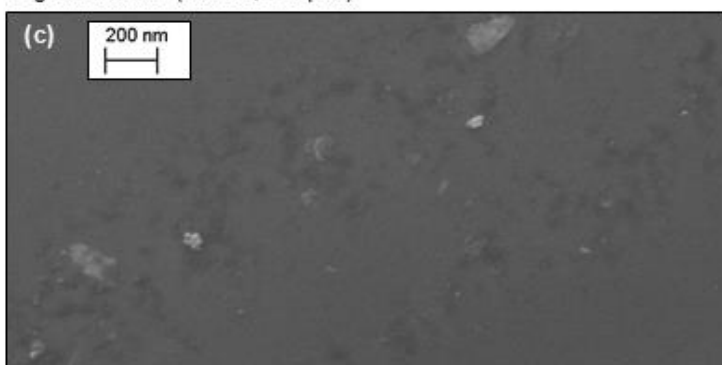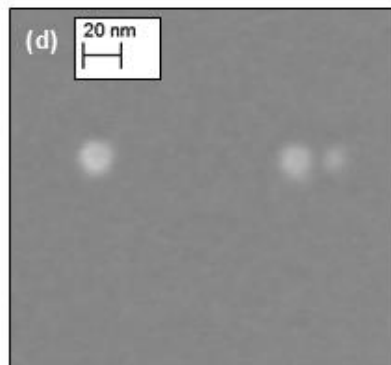

Aged exhaust (DR 200, 5 eqv.d)

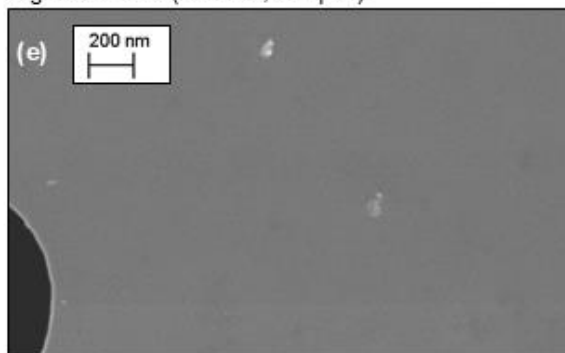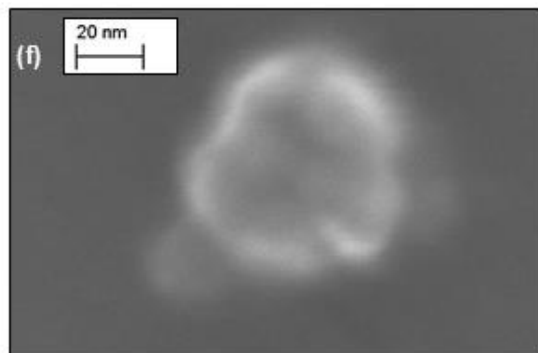

65 **Figure S3. Scanning electron micrographs illustrating the morphology of the exhaust particles in the fresh (a-b) and aged emissions (c-d: photochemical age 2 eqv.d, dilution ratio 50; e-f: photochemical age 5 eqv.d, dilution ratio 200). The large black areas in A and E are holes in the grids. Note that no implications on average particle size are to be driven based on these images of single particles.**

Fresh exhaust

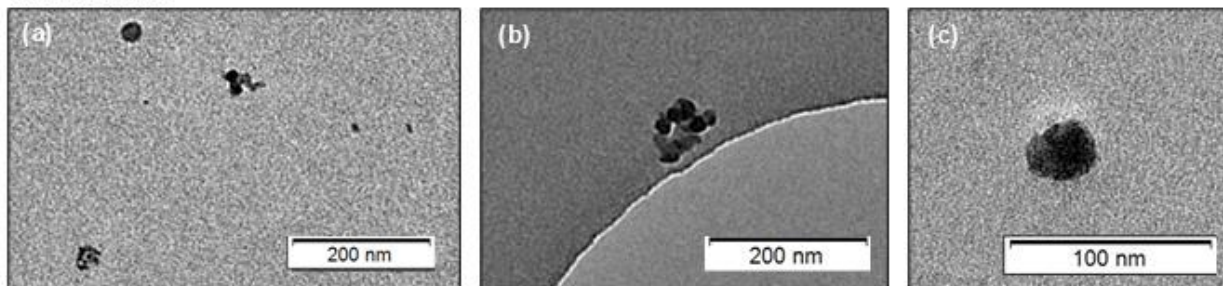

Aged exhaust (DR 50, 2 eqv.d)

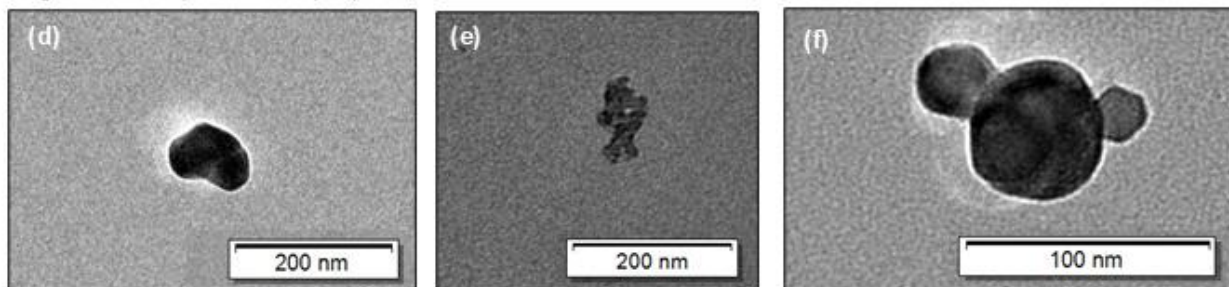

Aged exhaust; DR 200, 5 eqv.d

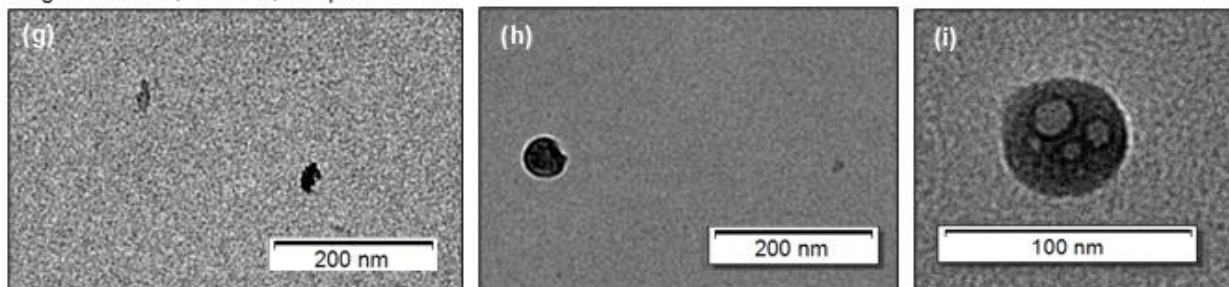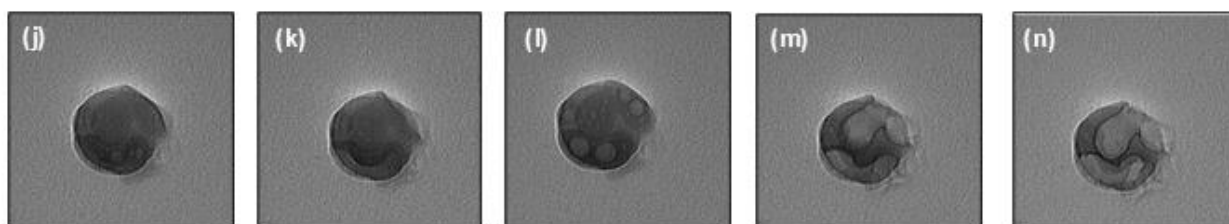

70 **Figure S4.** Transmission electron micrographs illustrating the morphology of the non-volatile exhaust particles in the fresh (a-c) and aged emissions (d-f: photochemical age 2 eqv.d, dilution ratio 50; g-n: photochemical age 5 eqv.d, dilution ratio 200). Micrographs in j-n illustrate the evaporation of a single particle (original diameter approx. 80 nm) when focusing the electron beam. Note that no implications on average particle size are to be driven based on these images of single particles.

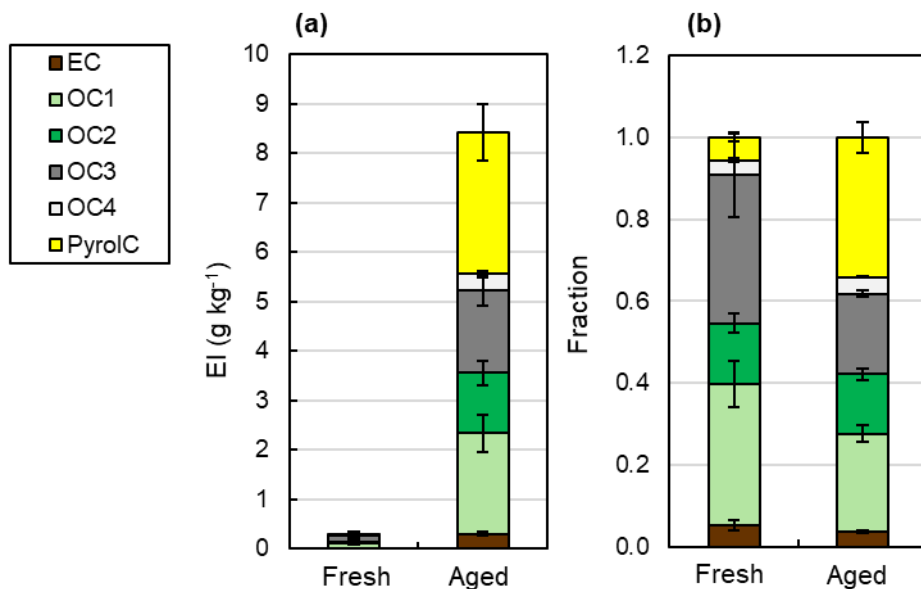

75 **Figure S5.** The absolute carbon EIs (a) and the relative fractions of the different volatility bins to the thermally derived carbon fractions to the total carbon content (b). Error bars indicate the standard deviation of total EI (a) or fraction contribution (b) within filter samples collected from repetitions ( $n = 6$  and 4 for fresh and aged exhausts, respectively).

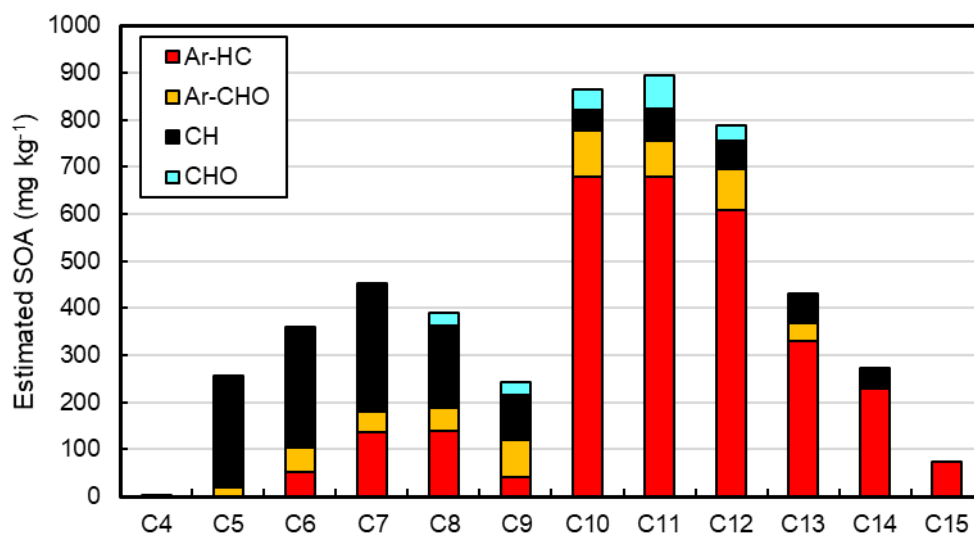

80 **Figure S6.** The bottom-up estimation of SOA production by compound group and number of carbon in the parent ion measured by PTR-ToF-MS.

## Supplementary tables

85 **Table S1. Composition of gas-phase adsorber tube containing three GCB layers separated by glass wool. Thermal desorption was carried out with reversed airflow.**

| Sampling order in direction of airflow | Sorbent                     | Weight (mg) |
|----------------------------------------|-----------------------------|-------------|
| 1                                      | Carbotrap® B (20-40 mesh)   | 60          |
| 2                                      | Carbotrap® Y (20-40 mesh)   | 60          |
| 3                                      | Carbotrap® 569 (20-40 mesh) | 60          |

90 **Table S2. Oxidation flow reactor conditions in each run with the PEAR, and estimated lifetimes of LVOCs in the exhaust with respect to partitioning to particles ( $T_{aer}$ ) or reactions with  $OH\cdot$  ( $T_{OH}$ ). \* atmospheric equivalent days at  $[OH\cdot] 1.5 \times 10^6 \text{ cm}^{-3}$ . \*\* at the PEAR exit.**

| Experiment run    | $OH_{exp}$                                          |                      | $F_{254, exp} / OH_{exp}$<br>( $\text{cm s}^{-1}$ ) | $CS_{PM}^{**}$<br>( $\text{s}^{-1}$ ) | LVOC $T_{aer}^{**}$<br>(ms) | LVOC $T_{OH}$<br>(s) |
|-------------------|-----------------------------------------------------|----------------------|-----------------------------------------------------|---------------------------------------|-----------------------------|----------------------|
|                   | ( $10^{10} \text{ molec. cm}^{-3} \text{ s}^{-1}$ ) | ( $\text{eqv.d}^*$ ) |                                                     |                                       |                             |                      |
| DR50 experiments  |                                                     |                      |                                                     |                                       |                             |                      |
| Run-2             | ~26                                                 | ~2                   | $1.6 \times 10^6$                                   | $470 \pm 14$                          | $2 \pm 0.1$                 | 130                  |
| Run-4             | ~26                                                 | ~2                   | $1.6 \times 10^6$                                   | $410 \pm 11$                          | $2 \pm 0.1$                 | 130                  |
| Run-7             | ~26                                                 | ~2                   | $1.6 \times 10^6$                                   | $420 \pm 25$                          | $2 \pm 0.2$                 | 130                  |
| Run-8             | ~26                                                 | ~2                   | $1.6 \times 10^6$                                   | $470 \pm 11$                          | $2 \pm 0.1$                 | 130                  |
| DR200 experiments |                                                     |                      |                                                     |                                       |                             |                      |
| Run-3             | 84                                                  | 6.50                 | $7.8 \times 10^5$                                   | $170 \pm 6.3$                         | $6 \pm 0.2$                 | 42                   |
| Run-3             | 41                                                  | 3.20                 | $6.0 \times 10^5$                                   | $170 \pm 17$                          | $6 \pm 0.7$                 | 85                   |
| Run-3             | 22                                                  | 1.70                 | $5.7 \times 10^5$                                   | $130 \pm 6.2$                         | $7 \pm 0.3$                 | 160                  |
| Run-3             | 8.1                                                 | 0.60                 | $7.6 \times 10^5$                                   | $85 \pm 4.3$                          | $12 \pm 0.6$                | 430                  |
| Run-7             | 74                                                  | 5.70                 | $9.3 \times 10^5$                                   | $170 \pm 4.5$                         | $6 \pm 0.2$                 | 47                   |
| Run-7             | 4.9                                                 | 0.38                 | $1.3 \times 10^6$                                   | $95 \pm 5.2$                          | $11 \pm 0.6$                | 720                  |
| Run-7             | 17                                                  | 1.28                 | $7.5 \times 10^5$                                   | $130 \pm 8.3$                         | $7 \pm 0.5$                 | 210                  |
| Run-8             | 84                                                  | 6.49                 | $8.1 \times 10^5$                                   | $190 \pm 6.3$                         | $5 \pm 0.2$                 | 42                   |
| Run-8             | 39                                                  | 3.04                 | $6.3 \times 10^5$                                   | $160 \pm 20$                          | $6 \pm 1$                   | 89                   |
| Run-8             | 21                                                  | 1.64                 | $2.9 \times 10^5$                                   | $77 \pm 8.7$                          | $13 \pm 1.6$                | 160                  |
| Run-8             | 3.0                                                 | 0.24                 | $2.0 \times 10^6$                                   | $67 \pm 0.4$                          | $15 \pm 0.1$                | 1150                 |

**Table S3. Internal standards used for quantification for GC-MS analyses.**

| Internal standard | Concentration<br>( $\text{g L}^{-1}$ ) | Targets                                                                                        |
|-------------------|----------------------------------------|------------------------------------------------------------------------------------------------|
| Toluene d8        | 0.2344                                 | Ethylbenzene, Styrene                                                                          |
| o-Xylene d10      | 0.0787                                 | m-Xylene, o-Xylene                                                                             |
| Naphthalene d8    | 0.0797                                 | Indane, Indene, Naphthalene, 2-Methylnaphthalene, 1-Methylnaphthalene, 1,2 Dimethylnaphthalene |
| Biphenyl d10      | 0.0719                                 | Biphenyl                                                                                       |
| Fluorene d10      | 0.0310                                 | Fluorene                                                                                       |
| n-Dodecane d26    | 0.0693                                 | Octadecane, Nonadecane, Decane, Undecane, Dodecane, Tridecane, Tetradecane                     |
| n-Hexadecane d34  | 0.0387                                 | Pentadecane, Hexadecane, Heptadecane, Octadecane                                               |



**Table S4. Ions measured by the PTR-ToF-MS: the applied reaction rates with  $\text{H}_3\text{O}^+$  (k), the determined average emission indices in the fresh and aged exhausts at DR50, and the secondary organic aerosol yield applied for the bottom-up yield estimation. ks are interpolated to 136 Td from the values available in Cappellin et al., (2012). k of  $2.00 \times 10^{-9} \text{ cm}^3 \text{ s}^{-1}$  was otherwise assumed. SOA mass yields were estimated based on literature values similarly as in Hartikainen et al., (2024). std refers to standard deviation during the operation time in DR50 experiments.**

| m/z   | ion formula | Group  | DBE | k<br>( $10^{-9} \text{ cm}^3 \text{ s}^{-1}$ ) | EI, fresh                              |     | EI, aged                               |     | SOA yield |
|-------|-------------|--------|-----|------------------------------------------------|----------------------------------------|-----|----------------------------------------|-----|-----------|
|       |             |        |     |                                                | (mg kg <sub>fuel</sub> <sup>-1</sup> ) |     | (mg kg <sub>fuel</sub> <sup>-1</sup> ) |     |           |
|       |             |        |     |                                                | mean                                   | std | mean                                   | std |           |
| 41.04 | (C3H4)H+    | CH     | 2   | 1.61                                           | 1744                                   | 131 | 501                                    | 84  | 0 %       |
| 42.03 | (C2H3N)H+   | CHN    | 1.5 | 3.85                                           | 3                                      | 4   | 2                                      | 1   | 0 %       |
| 42.01 | C2H2O+      | CHO    | 2   | 2                                              | 15                                     | 2   | 10                                     | 1   | 0 %       |
| 42.04 | C3H6+       | CH     | 4   | 2                                              | 58                                     | 8   | 18                                     | 3   | 0 %       |
| 43.02 | (C2H2O)H+   | CHO    | 2.5 | 2                                              | 920                                    | 64  | 3329                                   | 306 | 0 %       |
| 43.05 | (C3H6)H+    | CH     | 1   | 1.62                                           | 914                                    | 95  | 340                                    | 66  | 0 %       |
| 45.03 | (C2H4O)H+   | CHO    | 1.5 | 3.04                                           | 2294                                   | 82  | 1603                                   | 197 | 0 %       |
| 47.01 | (HCOOH)H+   | CHO    | 2   | 1.91                                           | 540                                    | 51  | 2412                                   | 354 | 0 %       |
| 47.05 | (C2H6O)H+   | CHO    | 0.5 | 2.07                                           | 5                                      | 2   | 2                                      | 3   | 0 %       |
| 49.03 | (CH4O2)H+   | CHO    | 0   | 2                                              | 6                                      | 1   | 74                                     | 11  | 0 %       |
| 49.02 | CH4S-H+     | CHS    | 1   | 2                                              | 2                                      | 1   | 4                                      | 2   | 0 %       |
| 53.04 | (C4H4)H+    | CH     | 3   | 2                                              | 49                                     | 3   | 14                                     | 2   | 0 %       |
| 55.05 | (C4H6)H+    | CH     | 3.5 | 1.8                                            | 1419                                   | 142 | 469                                    | 93  | 0 %       |
| 55.02 | (C3H2O)H+   | CHO    | 2   | 2                                              | 66                                     | 9   | 85                                     | 8   | 0 %       |
| 57.03 | (C3H4O)H+   | CHO    | 2.5 | 3.04                                           | 607                                    | 27  | 258                                    | 35  | 0 %       |
| 57.07 | (C4H8)H+    | CH     | 1   | 1.8                                            | 1509                                   | 147 | 362                                    | 81  | 0 %       |
| 59.05 | (C3H6O)H+   | CHO    | 1.5 | 3.01                                           | 1249                                   | 56  | 1898                                   | 131 | 0 %       |
| 61.03 | (C2H4O2)H+  | CHO    | 2   | 2.01                                           | 921                                    | 45  | 4023                                   | 417 | 0 %       |
| 63.01 | (CH2O3)H+   | CHO    | 2.5 | 2                                              | <1                                     |     | 51                                     | 11  | 0 %       |
| 65.02 | (CH4O3)H+   | CHO    | 1.5 | 2                                              | 2                                      | 1   | 38                                     | 5   | 0 %       |
| 67.06 | (C5H6)H+    | CH     | 3   | 1.83                                           | 210                                    | 13  | 65                                     | 11  | 0 %       |
| 69.03 | (C4H4O)H+   | CHO    | 3.5 | 2                                              | 126                                    | 6   | 70                                     | 8   | 0 %       |
| 69.07 | (C5H8)H+    | CH     | 2   | 2                                              | 968                                    | 93  | 268                                    | 61  | 26 %      |
| 71.01 | (C3H2O2)H+  | CHO    | 4   | 2                                              | 16                                     | 8   | 56                                     | 8   | 0 %       |
| 71.05 | (C4H6O)H+   | CHO    | 2.5 | 3.29                                           | 487                                    | 21  | 201                                    | 30  | 0 %       |
| 71.08 | (C5H10)H+   | CH     | 1   | 1.9                                            | 260                                    | 28  | 54                                     | 14  | 26 %      |
| 73.03 | (C3H4O2)H+  | CHO    | 3   | 2.55                                           | 319                                    | 12  | 290                                    | 27  | 0 %       |
| 73.06 | (C4H8O)H+   | CHO    | 1.5 | 2.99                                           | 375                                    | 20  | 489                                    | 48  | 0 %       |
| 75.04 | (C3H6O2)H+  | CHO    | 2   | 2.27                                           | 167                                    | 12  | 941                                    | 94  | 0 %       |
| 77.02 | (C2H4O3)H+  | CHO    | 2.5 | 2                                              | 10                                     | 3   | 379                                    | 99  | 0 %       |
| 79.05 | (C6H6)H+    | Ar-CH  | 4   | 1.93                                           | 258                                    | 18  | 119                                    | 20  | 37 %      |
| 81.03 | (C5H4O)H+   | Ar-CHO | 4.5 | 2                                              | 27                                     | 6   | 11                                     | 2   | 30 %      |
| 81.07 | (C6H8)H+    | CH     | 3   | 2                                              | 476                                    | 39  | 129                                    | 25  | 26 %      |
| 83.01 | (C4H2O2)H+  | Ar-CHO | 5   | 2                                              | 4                                      | 5   | 23                                     | 3   | 30 %      |
| 83.05 | (C5H6O)H+   | CHO    | 3.5 | 2                                              | 281                                    | 10  | 121                                    | 14  | 0 %       |
| 83.08 | (C6H10)H+   | CH     | 2   | 2                                              | 678                                    | 61  | 144                                    | 39  | 26 %      |
| 85.03 | (C4H4O2)H+  | CHO    | 4   | 2                                              | 196                                    | 11  | 242                                    | 33  | 0 %       |
| 85.06 | (C5H8O)H+   | CHO    | 2.5 | 2                                              | 390                                    | 17  | 304                                    | 40  | 0 %       |
| 85.1  | (C6H12)H+   | CH     | 1   | 2.02                                           | 133                                    | 15  | 29                                     | 9   | 26 %      |



|        |             |        |     |      |     |    |     |    |      |
|--------|-------------|--------|-----|------|-----|----|-----|----|------|
| 87.04  | (C4H6O2)H+  | CHO    | 4.5 | 1.7  | 524 | 32 | 958 | 56 | 0 %  |
| 87.08  | (C5H10O)H+  | CHO    | 3   | 3.07 | 138 | 11 | 152 | 22 | 0 %  |
| 87.01  | (C3H2O3)H+  | CHO    | 1.5 | 2    | 3   | 8  | 18  | 14 | 0 %  |
| 89.02  | (C3H4O3)H+  | CHO    | 3.5 | 2    | 26  | 5  | 129 | 12 | 0 %  |
| 89.06  | (C4H8O2)H+  | CHO    | 2   | 4.18 | 47  | 4  | 209 | 25 | 0 %  |
| 90.02  | (C2H3NO3)H+ | CHNO   | 3   | 2    | 22  | 5  | 71  | 16 | 0 %  |
| 91.04  | (C3H6O3)H+  | CHO    | 4   | 2    | 5   | 17 | 58  | 13 | 0 %  |
| 91     | (C2H2O4)H+  | CHO    | 2.5 | 2    | <1  |    | 6   | 5  | 0 %  |
| 91.05  | (C7H6)H+    | Ar-CH  | 5   | 2    | 131 | 18 | 26  | 5  | 37 % |
| 93.07  | (C7H8)H+    | Ar-CH  | 3   | 2.08 | 320 | 31 | 58  | 13 | 37 % |
| 93.04  | (C6H4O)H+   | Ar-CHO | 5.5 | 2    | 2   | 7  | 4   | 2  | 30 % |
| 93.02  | (C2H4O4)H+  | n.i.   | 4   | 2    | <1  |    | 4   | 1  | 36 % |
| 95.05  | (C6H6O)H+   | Ar-CHO | 6   | 2.14 | 142 | 11 | 42  | 5  | 30 % |
| 95.08  | (C7H10)H+   | CH     | 4.5 | 2    | 639 | 56 | 120 | 27 | 30 % |
| 95.01  | (C5H2O2)H+  | Ar-CHO | 3   | 2    | 1   | 4  | 4   | 5  | 26 % |
| 97.03  | (C5H4O2)H+  | Ar-CHO | 5   | 3.89 | 114 | 6  | 63  | 7  | 30 % |
| 97.06  | (C6H8O)H+   | CHO    | 3.5 | 2    | 334 | 14 | 151 | 19 | 0 %  |
| 97.1   | (C7H12)H+   | CH     | 2   | 2.09 | 553 | 55 | 94  | 27 | 26 % |
| 99.01  | (C4H2O3)H+  | Ar-CHO | 5.5 | 2    | 554 | 34 | 603 | 96 | 30 % |
| 99.04  | (C5H6O2)H+  | CHO    | 4   | 2    | 314 | 18 | 414 | 48 | 0 %  |
| 99.08  | (C6H10O)H+  | CHO    | 2.5 | 3.69 | 146 | 10 | 114 | 18 | 0 %  |
| 101.02 | (C4H4O3)H+  | CHO    | 4.5 | 2    | 25  | 28 | 380 | 73 | 0 %  |
| 101.06 | (C5H8O2)H+  | CHO    | 3   | 2.9  | 305 | 20 | 512 | 51 | 0 %  |
| 101.09 | (C6H12O)H+  | CHO    | 1.5 | 2.71 | 100 | 11 | 90  | 17 | 0 %  |
| 103.04 | (C4H6O3)H+  | CHO    | 3.5 | 2    | 37  | 7  | 136 | 19 | 0 %  |
| 103.07 | (C5H10O2)H+ | CHO    | 2   | 2    | 67  | 6  | 222 | 32 | 0 %  |
| 105.03 | (C7H4O)H+   | Ar-CHO | 6.5 | 2    | 8   | 5  | 41  | 15 | 30 % |
| 105.07 | (C8H8)H+    | Ar-CH  | 2.5 | 2.27 | 238 | 38 | 25  | 5  | 30 % |
| 105.05 | (C4H8O3)H+  | n.i.   | 5   | 2    | 11  | 39 | 28  | 7  | 0 %  |
| 107.05 | (C7H6O)H+   | Ar-CHO | 5.5 | 3.67 | 65  | 5  | 20  | 4  | 30 % |
| 107.08 | (C8H10)H+   | Ar-CH  | 4   | 2.26 | 286 | 24 | 38  | 9  | 30 % |
| 109.06 | (C7H8O)H+   | Ar-CHO | 6   | 2.31 | 118 | 12 | 39  | 5  | 30 % |
| 109.03 | (C6H4O2)H+  | Ar-CHO | 4.5 | 1.99 | 37  | 4  | 75  | 8  | 35 % |
| 109.1  | (C8H12)H+   | CH     | 3   | 2    | 528 | 50 | 85  | 21 | 26 % |
| 111.04 | (C6H6O2)H+  | Ar-CHO | 5   | 2    | 149 | 10 | 108 | 13 | 39 % |
| 111.08 | (C7H10O)H+  | CHO    | 3.5 | 2    | 270 | 11 | 118 | 19 | 0 %  |
| 111.12 | (C8H14)H+   | CH     | 2   | 2    | 276 | 28 | 43  | 13 | 26 % |
| 113.02 | (C5H4O3)H+  | Ar-CHO | 5.5 | 2    | 111 | 13 | 208 | 14 | 30 % |
| 113.06 | (C6H8O2)H+  | CHO    | 4   | 2    | 238 | 14 | 300 | 38 | 0 %  |
| 113.09 | (C7H12O)H+  | CHO    | 2.5 | 2    | 224 | 16 | 153 | 27 | 0 %  |
| 115.01 | (C4H2O4)H+  | Ar-CHO | 6   | 2    | 7   | 7  | 22  | 4  | 30 % |
| 115.04 | (C5H6O3)H+  | CHO    | 4.5 | 2    | 27  | 17 | 143 | 18 | 0 %  |
| 115.07 | (C6H10O2)H+ | CHO    | 3   | 2    | 267 | 16 | 478 | 52 | 0 %  |
| 115.11 | (C7H14O)H+  | CHO    | 1.5 | 2.78 | 95  | 13 | 81  | 17 | 0 %  |
| 117.02 | (C4H4O4)H+  | CHO    | 5   | 2    | <1  |    | 11  | 3  | 0 %  |
| 117.05 | (C5H8O3)H+  | CHO    | 3.5 | 2    | 10  | 7  | 73  | 10 | 0 %  |
| 117.09 | (C6H12O2)H+ | CHO    | 6   | 2    | 56  | 8  | 127 | 21 | 6 %  |
| 117.07 | (C9H8)H+    | Ar-CH  | 2   | 2.42 | 32  | 4  | <1  |    | 0 %  |
| 119.05 | (C8H6O)H+   | Ar-CHO | 6.5 | 2    | 11  | 12 | 27  | 5  | 30 % |

|        |             |        |     |      |     |    |     |    |      |
|--------|-------------|--------|-----|------|-----|----|-----|----|------|
| 119.08 | (C9H10)H+   | Ar-CH  | 5   | 2    | 289 | 22 | 34  | 10 | 6 %  |
| 121.03 | (C7H4O2)H+  | Ar-CHO | 7   | 2    | 1   | 5  | 7   | 3  | 30 % |
| 121.06 | (C8H8O)H+   | Ar-CHO | 5.5 | 3.28 | 113 | 13 | 38  | 7  | 30 % |
| 121.1  | (C9H12)H+   | Ar-CH  | 4   | 2.4  | 464 | 48 | 38  | 11 | 6 %  |
| 123.04 | (C7H6O2)H+  | Ar-CHO | 6   | 2.64 | 78  | 9  | 69  | 11 | 30 % |
| 123.08 | (C8H10O)H+  | Ar-CHO | 4.5 | 2    | 127 | 13 | 46  | 8  | 30 % |
| 123.12 | (C9H14)H+   | CH     | 3   | 2    | 346 | 32 | 51  | 14 | 26 % |
| 125.02 | (C6H4O3)H+  | Ar-CHO | 6.5 | 2    | 74  | 13 | 51  | 8  | 30 % |
| 125.06 | (C7H8O2)H+  | Ar-CHO | 5   | 2    | 127 | 11 | 115 | 16 | 30 % |
| 125.09 | (C8H12O)H+  | CHO    | 3.5 | 2    | 244 | 14 | 107 | 21 | 0 %  |
| 125.13 | (C9H16)H+   | CH     | 2   | 2    | 95  | 13 | 18  | 5  | 26 % |
| 127.04 | (C6H6O3)H+  | Ar-CHO | 5.5 | 2    | 46  | 10 | 105 | 12 | 30 % |
| 127.07 | (C7H10O2)H+ | CHO    | 4   | 2    | 179 | 14 | 216 | 35 | 0 %  |
| 127.11 | (C8H14O)H+  | CHO    | 2.5 | 2    | 166 | 13 | 97  | 20 | 0 %  |
| 129.06 | (C10H8)H+   | Ar-CH  | 6   | 2.45 | 128 | 23 | 2   | 4  | 30 % |
| 129.13 | (C8H16O)H+  | CHO    | 4.5 | 2.93 | 70  | 10 | 43  | 12 | 0 %  |
| 129.09 | (C7H12O2)H+ | CHO    | 7   | 2    | 321 | 42 | 331 | 50 | 73 % |
| 129.02 | (C5H4O4)H+  | Ar-CHO | 3   | 2    | 3   | 3  | 14  | 4  | 0 %  |
| 129.05 | (C6H8O3)H+  | CHO    | 1.5 | 2    | 7   | 12 | 143 | 19 | 0 %  |
| 131.03 | (C5H6O4)H+  | CHO    | 5   | 2    | 5   | 6  | 32  | 10 | 0 %  |
| 131.07 | (C6H10O3)H+ | CHO    | 7.5 | 2    | 8   | 22 | 46  | 8  | 0 %  |
| 131.1  | (C7H14O2)H+ | CHO    | 3.5 | 2    | 51  | 10 | 70  | 13 | 0 %  |
| 131.08 | (C10H10)H+  | n.i.   | 6   | 2    | 120 | 19 | 2   | 3  | 0 %  |
| 131.05 | (C9H6O)H+   | n.i.   | 2   | 2    | 17  | 6  | 1   | 3  | 0 %  |
| 133.03 | (C8H4O2)H+  | Ar-CHO | 8   | 2    | 2   | 6  | 33  | 9  | 30 % |
| 133.06 | (C9H8O)H+   | Ar-CHO | 6.5 | 2    | 39  | 22 | 27  | 5  | 30 % |
| 133.1  | (C10H12)H+  | Ar-CH  | 5   | 2    | 366 | 35 | 27  | 11 | 73 % |
| 135.04 | (C8H6O2)H+  | Ar-CHO | 7   | 2    | 69  | 11 | 60  | 12 | 30 % |
| 135.08 | (C9H10O)H+  | Ar-CHO | 5.5 | 2    | 208 | 32 | 53  | 11 | 30 % |
| 135.11 | (C10H14)H+  | Ar-CH  | 4   | 2.5  | 572 | 64 | 32  | 10 | 73 % |
| 137.06 | (C8H8O2)H+  | Ar-CHO | 6   | 2    | 78  | 10 | 79  | 11 | 30 % |
| 137.09 | (C9H12O)H+  | Ar-CHO | 4.5 | 2    | 110 | 14 | 40  | 8  | 30 % |
| 137.13 | (C10H16)H+  | CH     | 3   | 2.47 | 193 | 18 | 25  | 7  | 26 % |
| 139.04 | (C7H6O3)H+  | Ar-CHO | 6.5 | 2    | 51  | 11 | 59  | 17 | 30 % |
| 139.07 | (C8H10O2)H+ | Ar-CHO | 5   | 2    | 110 | 15 | 110 | 19 | 30 % |
| 139.11 | (C9H14O)H+  | CHO    | 3.5 | 2    | 223 | 15 | 88  | 20 | 0 %  |
| 139.15 | (C10H18)H+  | n.i.   | 1   | 2    | 52  | 11 | 13  | 4  | 0 %  |
| 141.05 | (C7H8O3)H+  | Ar-CHO | 7   | 2    | 40  | 11 | 101 | 15 | 30 % |
| 141.09 | (C8H12O2)H+ | CHO    | 5.5 | 2    | 150 | 14 | 159 | 30 | 30 % |
| 141.13 | (C9H16O)H+  | CHO    | 4   | 2    | 137 | 12 | 68  | 18 | 0 %  |
| 141.02 | (C6H4O4)H+  | Ar-CHO | 2.5 | 2    | 3   | 3  | 24  | 6  | 0 %  |
| 143.1  | (C8H14O2)H+ | CHO    | 6   | 2    | 225 | 36 | 140 | 26 | 30 % |
| 143.03 | (C6H6O4)H+  | Ar-CHO | 4.5 | 2    | <1  |    | 26  | 7  | 0 %  |
| 143.14 | (C9H18O)H+  | CHO    | 7   | 3.17 | 69  | 10 | 31  | 9  | 63 % |
| 143.07 | (C7H10O3)H+ | CHO    | 3   | 2    | 27  | 82 | 131 | 19 | 0 %  |
| 143.08 | (C11H10)H+  | Ar-CH  | 1.5 | 2.7  | 343 | 48 | 5   | 6  | 0 %  |
| 145.05 | (C6H8O4)H+  | CHO    | 5   | 2    | 6   | 10 | 36  | 11 | 0 %  |
| 145.09 | (C7H12O3)H+ | CHO    | 7.5 | 2    | 16  | 43 | 27  | 6  | 0 %  |
| 145.12 | (C8H16O2)H+ | CHO    | 3.5 | 2    | 43  | 15 | 42  | 10 | 0 %  |

|        |              |        |     |      |     |     |     |    |      |
|--------|--------------|--------|-----|------|-----|-----|-----|----|------|
| 145.1  | (C11H12)H+   | Ar-CH  | 6   | 2    | 213 | 45  | 3   | 4  | 63 % |
| 145.06 | (C10H8O)H+   | n.i.   | 2   | 2    | 32  | 12  | 3   | 5  | 0 %  |
| 147.04 | (C9H6O2)H+   | Ar-CHO | 8   | 2    | 44  | 9   | 63  | 16 | 30 % |
| 147.12 | (C11H14)H+   | Ar-CH  | 6.5 | 2    | 493 | 62  | 21  | 8  | 30 % |
| 147.08 | (C10H10O)H+  | Ar-CHO | 5   | 2    | 58  | 34  | 32  | 7  | 63 % |
| 149.02 | (C8H4O3)H+   | Ar-CHO | 8.5 | 2    | 263 | 37  | 392 | 77 | 30 % |
| 149.06 | (C9H8O2)H+   | Ar-CHO | 7   | 2    | 147 | 28  | 134 | 28 | 30 % |
| 149.09 | (C10H12O)H+  | Ar-CHO | 5.5 | 2    | 194 | 41  | 52  | 11 | 30 % |
| 149.13 | (C11H16)H+   | Ar-CH  | 4   | 2    | 679 | 73  | 36  | 12 | 63 % |
| 151.04 | (C8H6O3)H+   | Ar-CHO | 7.5 | 2    | 18  | 5   | 19  | 4  | 30 % |
| 151.07 | (C9H10O2)H+  | Ar-CHO | 6   | 2    | 64  | 8   | 56  | 10 | 30 % |
| 151.11 | (C10H14O)H+  | Ar-CHO | 4.5 | 2    | 108 | 19  | 34  | 8  | 30 % |
| 151.15 | (C11H18)H+   | CH     | 3   | 2    | 240 | 26  | 25  | 7  | 26 % |
| 153.09 | (C9H12O2)H+  | Ar-CHO | 6.5 | 2    | 101 | 19  | 97  | 20 | 30 % |
| 153.13 | (C10H16O)H+  | CHO    | 5   | 2    | 209 | 21  | 72  | 19 | 30 % |
| 153.16 | (C11H20)H+   | CH     | 3.5 | 2    | 45  | 9   | 9   | 4  | 30 % |
| 153.05 | (C8H8O3)H+   | Ar-CHO | 2   | 2    | 24  | 8   | 40  | 8  | 0 %  |
| 155.1  | (C9H14O2)H+  | CHO    | 7   | 4.93 | 47  | 5   | 34  | 8  | 30 % |
| 155.03 | (C7H6O4)H+   | Ar-CHO | 5.5 | 2    | <1  |     | 16  | 5  | 30 % |
| 155.14 | (C10H18O)H+  | CHO    | 4   | 2    | 139 | 16  | 56  | 16 | 0 %  |
| 155.07 | (C8H10O3)H+  | Ar-CHO | 2.5 | 2    | 65  | 19  | 96  | 16 | 0 %  |
| 157.05 | (C7H8O4)H+   | Ar-CHO | 6   | 2    | 12  | 7   | 48  | 10 | 30 % |
| 157.08 | (C8H12O3)H+  | CHO    | 4.5 | 2    | 77  | 124 | 105 | 17 | 0 %  |
| 157.12 | (C9H16O2)H+  | CHO    | 7   | 2    | 237 | 44  | 115 | 29 | 0 %  |
| 157.16 | (C10H20O)H+  | CHO    | 3   | 3.03 | 83  | 12  | 35  | 12 | 0 %  |
| 157.1  | (C12H12)H+   | n.i.   | 1.5 | 2    | 566 | 111 | 5   | 11 | 0 %  |
| 159.08 | (C11H10O)H+  | n.i.   | 5   | 2    | 22  | 12  | <1  |    | 0 %  |
| 159.06 | (C7H10O4)H+  | CHO    | 7.5 | 2    | 25  | 9   | 39  | 9  | 0 %  |
| 159.1  | (C8H14O3)H+  | n.i.   | 2   | 2    | 22  | 45  | 19  | 5  | 0 %  |
| 159.14 | (C9H18O2)H+  | CHO    | 1   | 2    | 46  | 14  | 23  | 7  | 0 %  |
| 159.11 | (C12H14)H+   | n.i.   | 2   | 2    | 196 | 46  | 6   | 5  | 0 %  |
| 161.06 | (C10H8O2)H+  | Ar-CHO | 8   | 2    | 37  | 10  | 44  | 11 | 30 % |
| 161.09 | (C11H12O)H+  | Ar-CHO | 6.5 | 2    | 79  | 39  | 27  | 7  | 30 % |
| 161.13 | (C12H16)H+   | Ar-CH  | 5   | 2    | 463 | 61  | 16  | 7  | 58 % |
| 163.04 | (C9H6O3)H+   | Ar-CHO | 8.5 | 2    | 166 | 44  | 267 | 57 | 30 % |
| 163.07 | (C10H10O2)H+ | Ar-CHO | 7   | 2    | 137 | 34  | 96  | 25 | 30 % |
| 163.11 | (C11H14O)H+  | Ar-CHO | 5.5 | 2    | 136 | 52  | 46  | 10 | 30 % |
| 163.14 | (C12H18)H+   | Ar-CH  | 4   | 2    | 635 | 64  | 32  | 11 | 58 % |
| 165.02 | (C8H4O4)H+   | Ar-CHO | 9   | 2    | 6   | 4   | 8   | 2  | 30 % |
| 165.05 | (C9H8O3)H+   | Ar-CHO | 7.5 | 2    | 19  | 5   | 27  | 7  | 30 % |
| 165.09 | (C10H12O2)H+ | Ar-CHO | 6   | 2    | 48  | 10  | 42  | 9  | 30 % |
| 165.13 | (C11H16O)H+  | Ar-CHO | 4.5 | 2    | 119 | 24  | 34  | 9  | 30 % |
| 165.16 | (C12H20)H+   | CH     | 3   | 2    | 251 | 31  | 20  | 7  | 26 % |
| 167.1  | (C10H14O2)H+ | Ar-CHO | 8   | 2    | 95  | 22  | 82  | 20 | 30 % |
| 167.07 | (C9H10O3)H+  | Ar-CHO | 6.5 | 2    | 25  | 9   | 39  | 9  | 30 % |
| 167.14 | (C11H18O)H+  | CHO    | 5   | 2    | 217 | 24  | 63  | 17 | 30 % |
| 167.03 | (C8H6O4)H+   | Ar-CHO | 3.5 | 2    | 3   | 2   | 10  | 3  | 0 %  |
| 169.05 | (C8H8O4)H+   | Ar-CHO | 7   | 2    | 3   | 4   | 20  | 5  | 30 % |
| 169.08 | (C9H12O3)H+  | Ar-CHO | 5.5 | 2    | 74  | 21  | 82  | 16 | 30 % |

|        |              |        |     |      |     |    |     |    |      |
|--------|--------------|--------|-----|------|-----|----|-----|----|------|
| 169.12 | (C10H16O2)H+ | CHO    | 4   | 2.86 | 118 | 15 | 62  | 16 | 0 %  |
| 169.16 | (C11H20O)H+  | CHO    | 2.5 | 2    | 153 | 19 | 52  | 17 | 0 %  |
| 171.06 | (C8H10O4)H+  | Ar-CHO | 6   | 2    | 23  | 11 | 46  | 10 | 0 %  |
| 171.1  | (C9H14O3)H+  | CHO    | 4.5 | 4.72 | 12  | 22 | 33  | 7  | 0 %  |
| 171.13 | (C10H18O2)H+ | CHO    | 3   | 2    | 253 | 43 | 91  | 29 | 0 %  |
| 171.17 | (C11H22O)H+  | CHO    | 1.5 | 2    | 126 | 17 | 61  | 21 | 0 %  |
| 173.05 | (C11H8O2)H+  | Ar-CHO | 9   | 2    | 10  | 4  | 17  | 5  | 30 % |
| 173.09 | (C8H12O4)H+  | CHO    | 5   | 2    | 29  | 18 | 19  | 6  | 0 %  |
| 173.13 | (C13H16)H+   | Ar-CH  | 5   | 2    | 167 | 22 | 17  | 6  | 0 %  |
| 173.08 | C8H12O4      | n.i.   | 6   | 2    | 7   | 5  | 17  | 5  | 58 % |
| 173.15 | (C10H20O2)H+ | n.i.   | 2   | 2    | 28  | 13 | 10  | 4  | 0 %  |
| 175.04 | (C10H6O3)H+  | Ar-CHO | 9.5 | 2    | 5   | 4  | 13  | 3  | 30 % |
| 175.07 | (C11H10O2)H+ | Ar-CHO | 8   | 2    | 21  | 7  | 26  | 7  | 30 % |
| 175.11 | (C12H14O)H+  | Ar-CHO | 6.5 | 2    | 72  | 34 | 18  | 6  | 30 % |
| 175.15 | (C13H18)H+   | Ar-CH  | 5   | 2    | 326 | 46 | 11  | 5  | 58 % |
| 177.05 | (C10H8O3)H+  | Ar-CHO | 8.5 | 2    | 61  | 31 | 102 | 23 | 30 % |
| 177.09 | (C11H12O2)H+ | Ar-CHO | 7   | 2    | 39  | 27 | 44  | 13 | 0 %  |
| 177.12 | (C12H16O)H+  | Ar-CHO | 5.5 | 2    | 116 | 55 | 27  | 8  | 30 % |
| 177.16 | (C13H20)H+   | Ar-CH  | 4   | 2    | 521 | 74 | 25  | 9  | 30 % |
| 179.03 | (C9H6O4)H+   | Ar-CHO | 9   | 2    | 3   | 2  | 10  | 3  | 30 % |
| 179.07 | (C10H10O3)H+ | Ar-CHO | 7.5 | 2    | 14  | 5  | 18  | 5  | 30 % |
| 179.1  | (C11H14O2)H+ | Ar-CHO | 6   | 2    | 40  | 11 | 34  | 8  | 30 % |
| 179.14 | (C12H18O)H+  | Ar-CHO | 4.5 | 2    | 119 | 27 | 29  | 9  | 30 % |
| 179.18 | (C13H22)H+   | CH     | 3   | 2    | 253 | 36 | 17  | 5  | 26 % |
| 181.04 | (C9H8O4)H+   | Ar-CHO | 8   | 2    | 3   | 2  | 11  | 3  | 30 % |
| 181.08 | (C10H12O3)H+ | Ar-CHO | 6.5 | 2    | 19  | 9  | 36  | 9  | 30 % |
| 181.12 | (C11H16O2)H+ | Ar-CHO | 5   | 2    | 93  | 25 | 68  | 18 | 30 % |
| 181.16 | (C12H20O)H+  | CHO    | 3.5 | 2    | 199 | 23 | 48  | 14 | 0 %  |
| 183.13 | (C11H18O2)H+ | CHO    | 7   | 2    | 152 | 24 | 71  | 21 | 30 % |
| 183.17 | (C12H22O)H+  | CHO    | 5.5 | 2    | 155 | 20 | 44  | 14 | 30 % |
| 183.1  | (C10H14O3)H+ | Ar-CHO | 4   | 2    | 51  | 18 | 64  | 15 | 0 %  |
| 183.06 | (C9H10O4)H+  | Ar-CHO | 2.5 | 2    | 5   | 4  | 22  | 6  | 0 %  |
| 185.08 | (C9H12O4)H+  | Ar-CHO | 6   | 2    | 6   | 6  | 45  | 10 | 30 % |
| 185.11 | (C10H16O3)H+ | CHO    | 4.5 | 3.82 | 40  | 16 | 32  | 7  | 0 %  |
| 185.15 | (C11H20O2)H+ | CHO    | 3   | 2    | 238 | 36 | 74  | 28 | 0 %  |
| 185.19 | (C12H24O)H+  | CHO    | 1.5 | 2    | 124 | 19 | 59  | 23 | 0 %  |
| 189.05 | (C11H8O3)H+  | Ar-CHO | 9.5 | 2    | 3   | 3  | 14  | 4  | 30 % |
| 189.16 | (C14H20)H+   | Ar-CH  | 5   | 2    | 188 | 27 | 6   | 4  | 30 % |
| 191.07 | (C11H10O3)H+ | Ar-CHO | 8.5 | 2    | 32  | 13 | 47  | 10 | 30 % |
| 191.1  | (C12H14O2)H+ | Ar-CHO | 7   | 2    | 50  | 15 | 25  | 8  | 30 % |
| 191.14 | (C13H18O)H+  | Ar-CHO | 5.5 | 2    | 67  | 36 | 17  | 6  | 30 % |
| 191.18 | (C14H22)H+   | Ar-CH  | 4   | 2    | 318 | 45 | 15  | 6  | 58 % |
| 193.04 | (C10H8O4)H+  | Ar-CHO | 9   | 2    | 2   | 2  | 11  | 3  | 30 % |
| 193.08 | (C11H12O3)H+ | Ar-CHO | 7.5 | 2    | 8   | 4  | 14  | 4  | 30 % |
| 193.12 | (C12H16O2)H+ | Ar-CHO | 6   | 2    | 31  | 11 | 25  | 7  | 30 % |
| 193.16 | (C13H20O)H+  | Ar-CHO | 4.5 | 2    | 96  | 20 | 22  | 7  | 30 % |
| 193.19 | (C14H24)H+   | CH     | 3   | 2    | 172 | 27 | 11  | 4  | 26 % |
| 195.1  | (C11H14O3)H+ | Ar-CHO | 6.5 | 2    | 15  | 8  | 34  | 9  | 30 % |
| 195.13 | (C12H18O2)H+ | Ar-CHO | 5   | 2    | 72  | 22 | 48  | 14 | 30 % |

|        |              |        |     |   |     |    |    |    |      |
|--------|--------------|--------|-----|---|-----|----|----|----|------|
| 195.17 | (C13H22O)H+  | CHO    | 3.5 | 2 | 169 | 24 | 35 | 11 | 0 %  |
| 197.08 | (C10H12O4)H+ | Ar-CHO | 7   | 2 | 5   | 4  | 24 | 6  | 30 % |
| 197.11 | (C11H16O3)H+ | Ar-CHO | 5.5 | 2 | 34  | 14 | 49 | 12 | 30 % |
| 197.15 | (C12H20O2)H+ | CHO    | 4   | 2 | 117 | 24 | 46 | 16 | 0 %  |
| 197.19 | (C13H24O)H+  | CHO    | 2.5 | 2 | 148 | 22 | 33 | 12 | 0 %  |
| 199.1  | (C10H14O4)H+ | Ar-CHO | 6   | 2 | 6   | 5  | 39 | 9  | 30 % |
| 199.13 | (C11H18O3)H+ | CHO    | 4.5 | 2 | 35  | 22 | 41 | 10 | 0 %  |
| 199.17 | (C12H22O2)H+ | CHO    | 3   | 2 | 177 | 30 | 49 | 20 | 0 %  |
| 199.2  | (C13H26O)H+  | CHO    | 1.5 | 2 | 134 | 21 | 46 | 21 | 0 %  |
| 205.09 | (C12H12O3)H+ | Ar-CHO | 8.5 | 2 | 30  | 12 | 35 | 12 | 30 % |
| 205.19 | (C15H24)H+   | Ar-CH  | 4   | 2 | 136 | 13 | 10 | 6  | 58 % |

105 **Table S5. n-Alkanes (C<sub>8</sub>-C<sub>18</sub>) measured by the GC-MS system in the gaseous exhaust emissions. The factors their measured intensity exceeded the calibration standard by are also shown for both fresh and aged exhaust gases. The highest point of calibration would correspond to EI of 18 mg kg<sub>fuel</sub><sup>-1</sup>.**

| Compound      | Exceedance of calibration |      |
|---------------|---------------------------|------|
|               | Fresh                     | Aged |
| n-Octane      | x4                        | x2   |
| n-Nonane      | x5                        | x2   |
| n-Decane      | x8                        | x3   |
| n-Undecane    | x16                       | x4   |
| n-Dodecane    | x16                       | x4   |
| n-Tridecane   | x16                       | x4   |
| n-Tetradecane | x16                       | x4   |
| n-Pentadecane | x14                       | x3   |
| n-Hexadecane  | x14                       | x3   |
| n-Heptadecane | x12                       | x2   |
| n-Octadecane  | x12                       | x2   |

## References

- 110 Cappellin, L., Karl, T., Probst, M., Ismailova, O., Winkler, P. M., Soukoulis, C., Aprea, E., Märk, T. D., Gasperi, F., & Biasioli, F. (2012). On quantitative determination of volatile organic compound concentrations using proton transfer reaction time-of-flight mass spectrometry. *Environmental Science and Technology*, 46(4), 2283–2290. <https://doi.org/10.1021/es203985t>
- 115 Hartikainen, A. H., Basnet, S., Yli-Pirilä, P., Ihalainen, M., Talvinen, S., Tissari, J., Mikkonen, S., Zimmermann, R., & Sippula, O. (2024). Resolving emission factors and formation pathways of organic gaseous compounds from residential combustion of European brown coal. *Combustion and Flame*, 265, 113485. <https://doi.org/10.1016/j.combustflame.2024.113485>
- 120 Hartikainen, A., Tiitta, P., Ihalainen, M., Yli-Pirilä, P., Orasche, J., Czech, H., Kortelainen, M., Lamberg, H., Suhonen, H., Koponen, H., Hao, L., Zimmermann, R., Jokiniemi, J., Tissari, J., & Sippula, O. (2020). Photochemical transformation of residential wood combustion emissions: Dependence of organic aerosol composition on OH exposure. *Atmospheric Chemistry and Physics*, 20(11). <https://doi.org/10.5194/acp-20-6357-2020>
- 125 Ihalainen, M., Tiitta, P., Czech, H., Yli-Pirilä, P., Hartikainen, A., Kortelainen, M., Tissari, J., Stengel, B., Sklorz, M., Suhonen, H., Lamberg, H., Leskinen, A., Kiendler-Scharr, A., Harndorf, H., Zimmermann, R., Jokiniemi, J., & Sippula, O. (2019). A novel high-volume Photochemical Emission Aging flow tube Reactor (PEAR). *Aerosol Science and Technology*, 53(3), 276–294. <https://doi.org/10.1080/02786826.2018.1559918>
- Palm, B. B., Campuzano-Jost, P., Ortega, A. M., Day, D. A., Kaser, L., Jud, W., Karl, T., Hansel, A., Hunter, J. F., Cross, E. S., Kroll, J. H., Peng, Z., Brune, W. H., & Jimenez, J. L. (2016). In situ secondary organic aerosol formation from ambient pine forest air using an oxidation flow reactor. *Atmospheric Chemistry and Physics*, 16(5), 2943–2970. <https://doi.org/10.5194/acp-16-2943-2016>

130
